# Supplementary figures and images for: Bioequivalence study of dacomitinib and Vizimpro® in healthy Chinese volunteers under fasting and fed conditions: A randomized, open‐label, single‐dose, crossover trial
Source: PubMed Central journal article supplement — Clin Transl Sci. 2023 Oct 19;16(12):2591–603. doi: 10.1111/cts.13653 (PMC10719465; doi:10.1111/cts.13653), 2023-10-19

Figure S2 Separate semi-logarithmic plots of plasma concentrations versus time at fed state

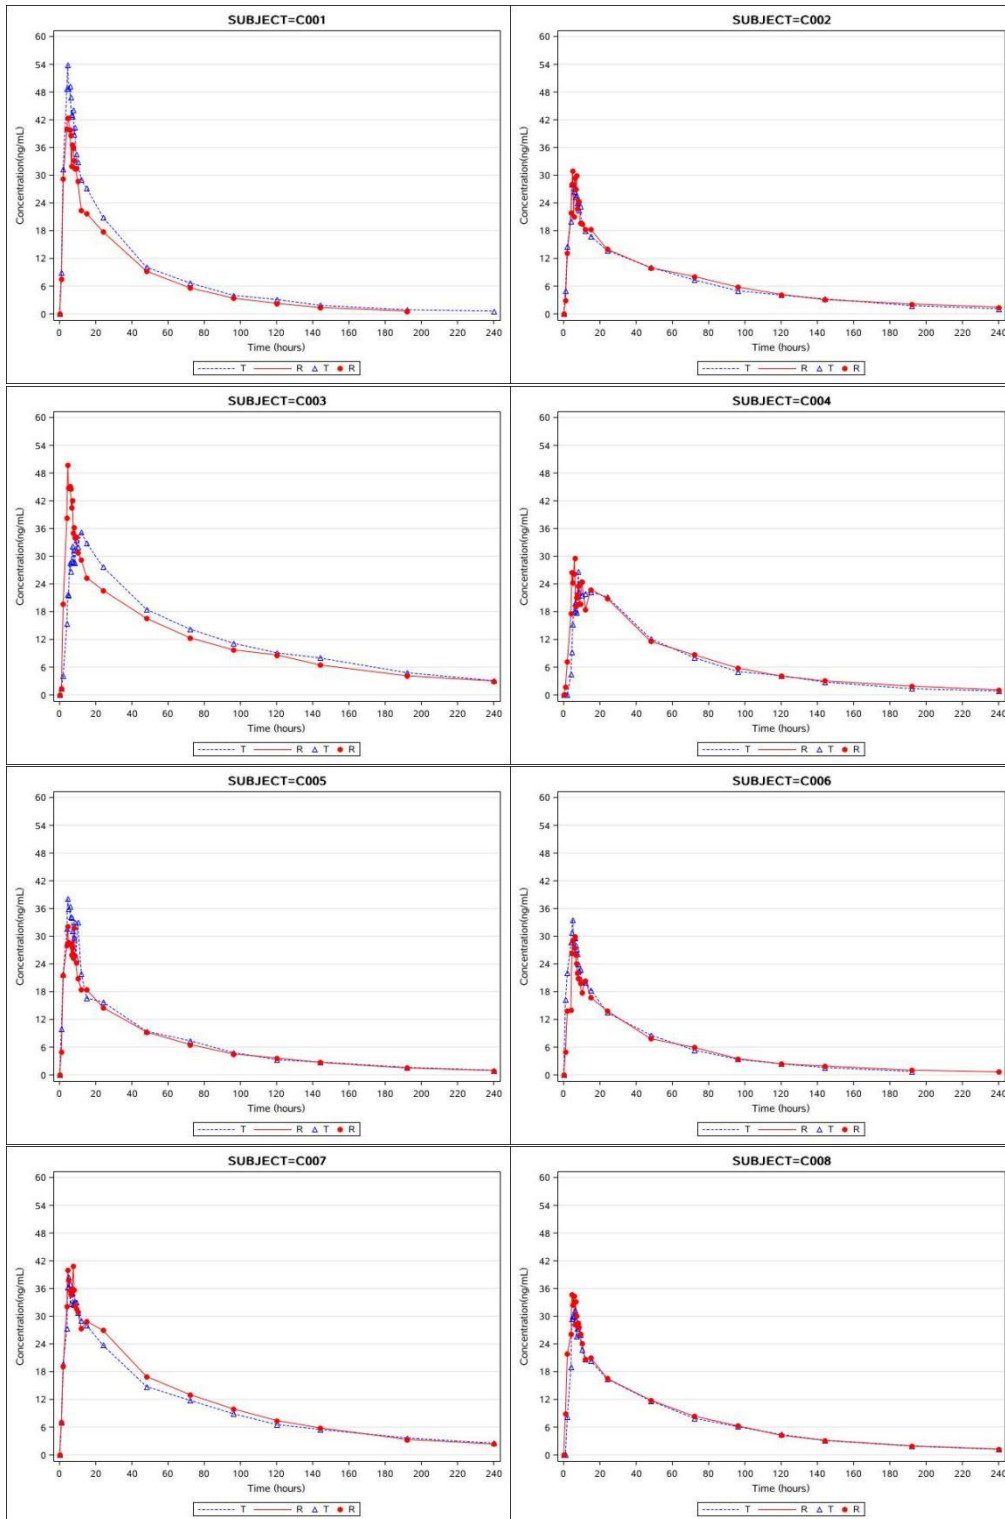

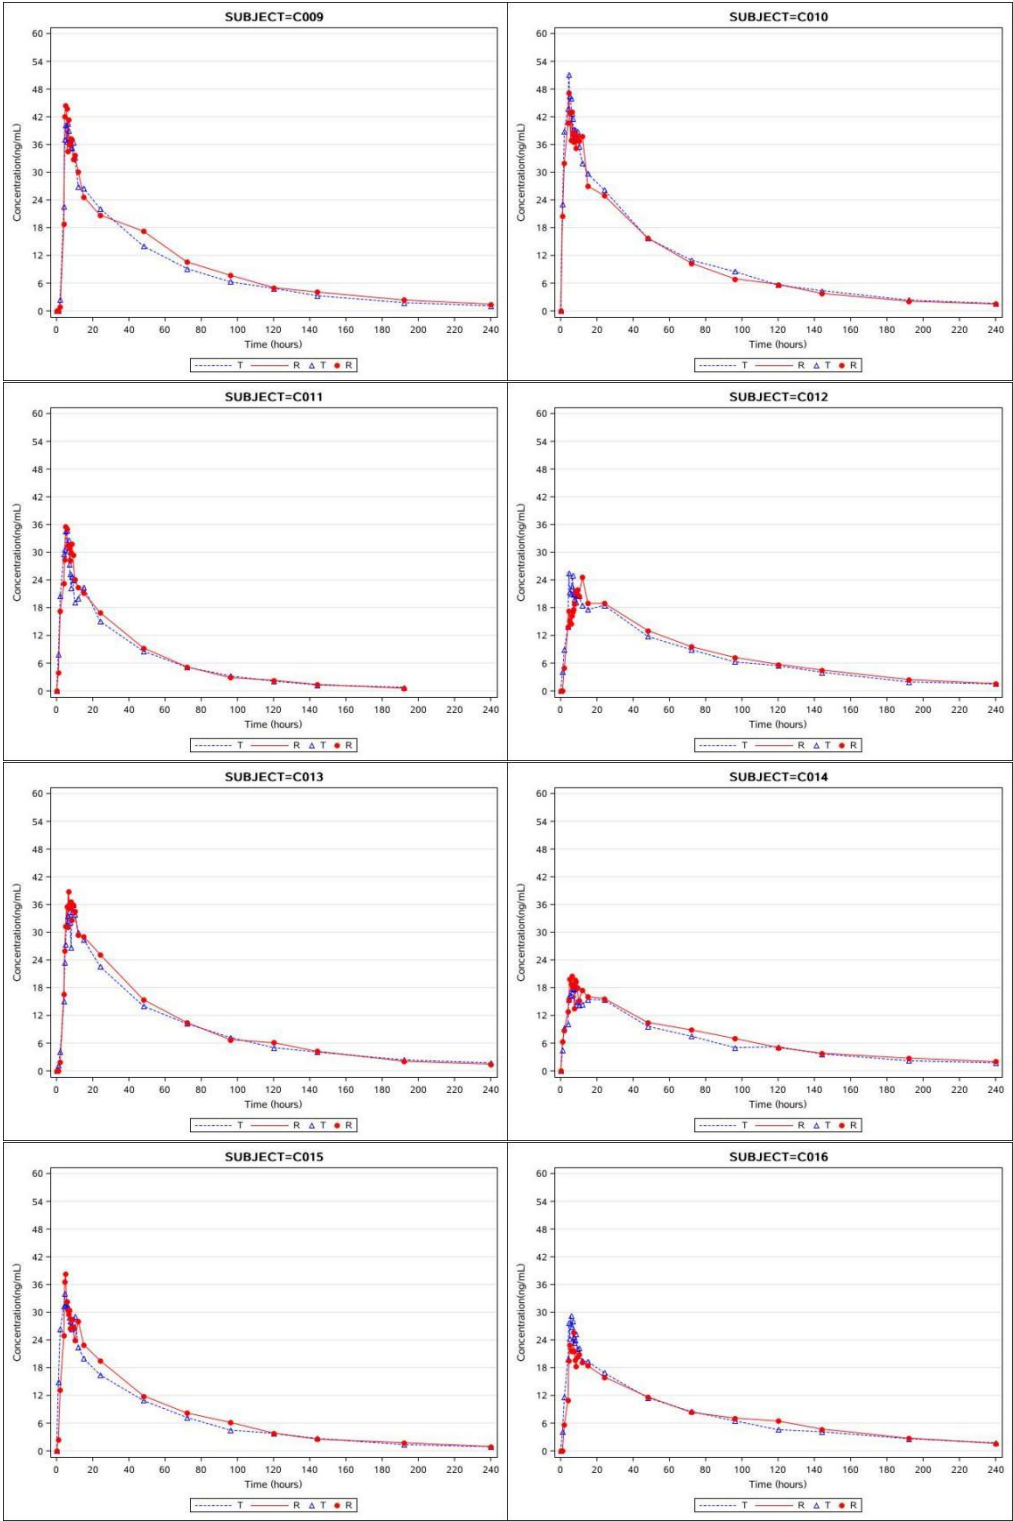

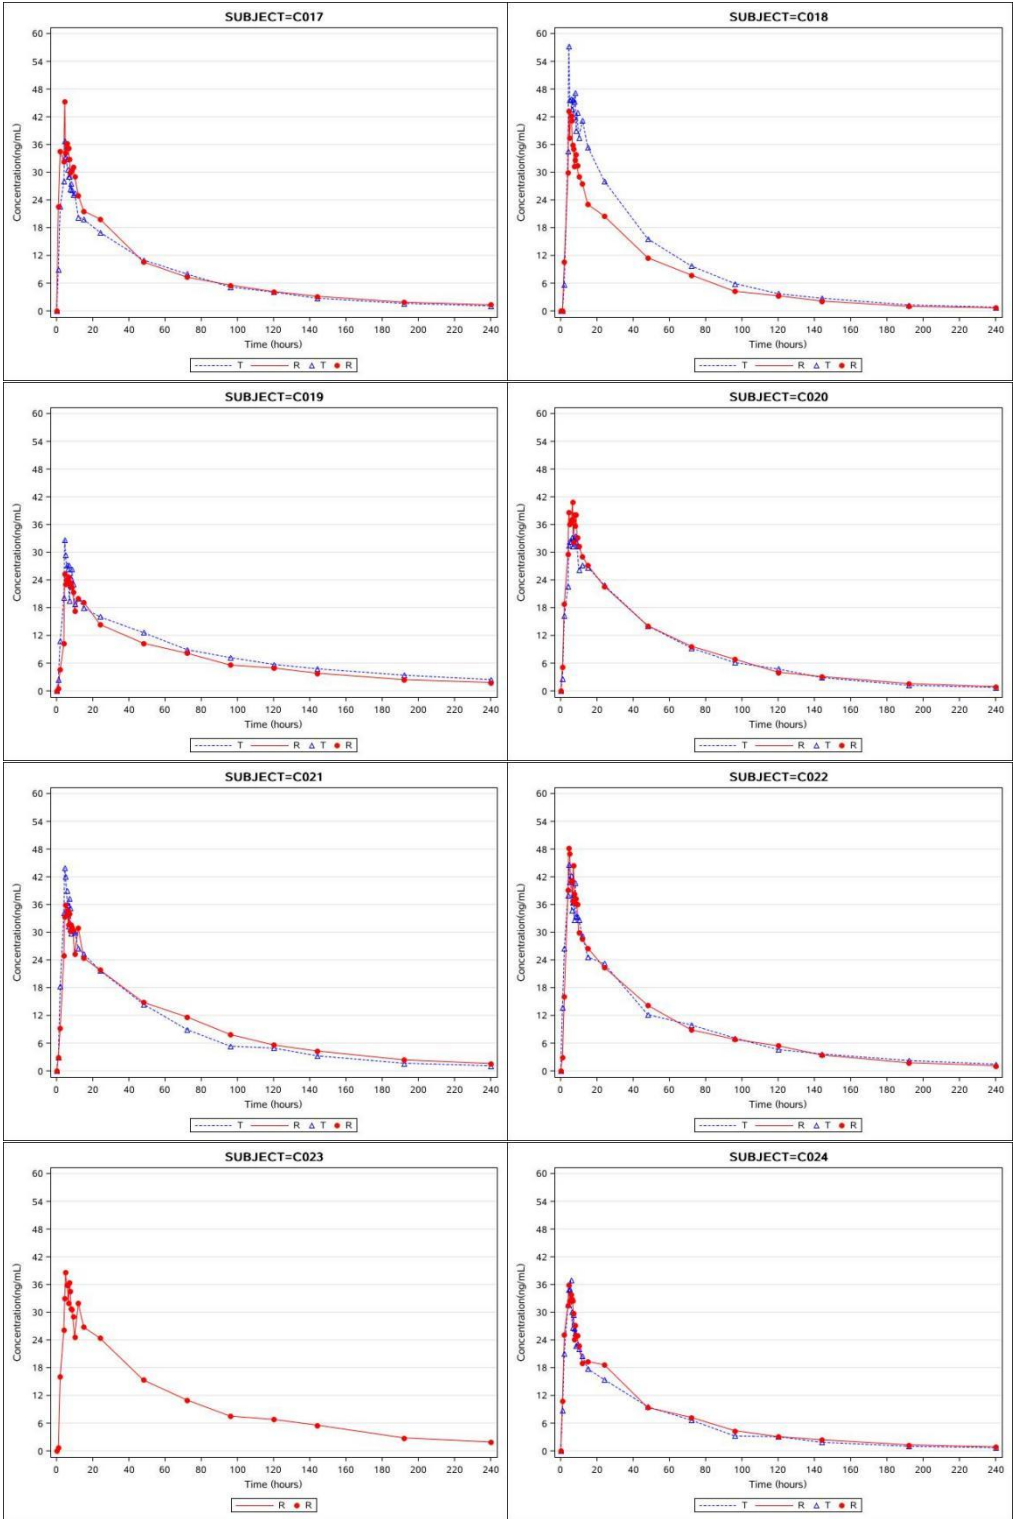

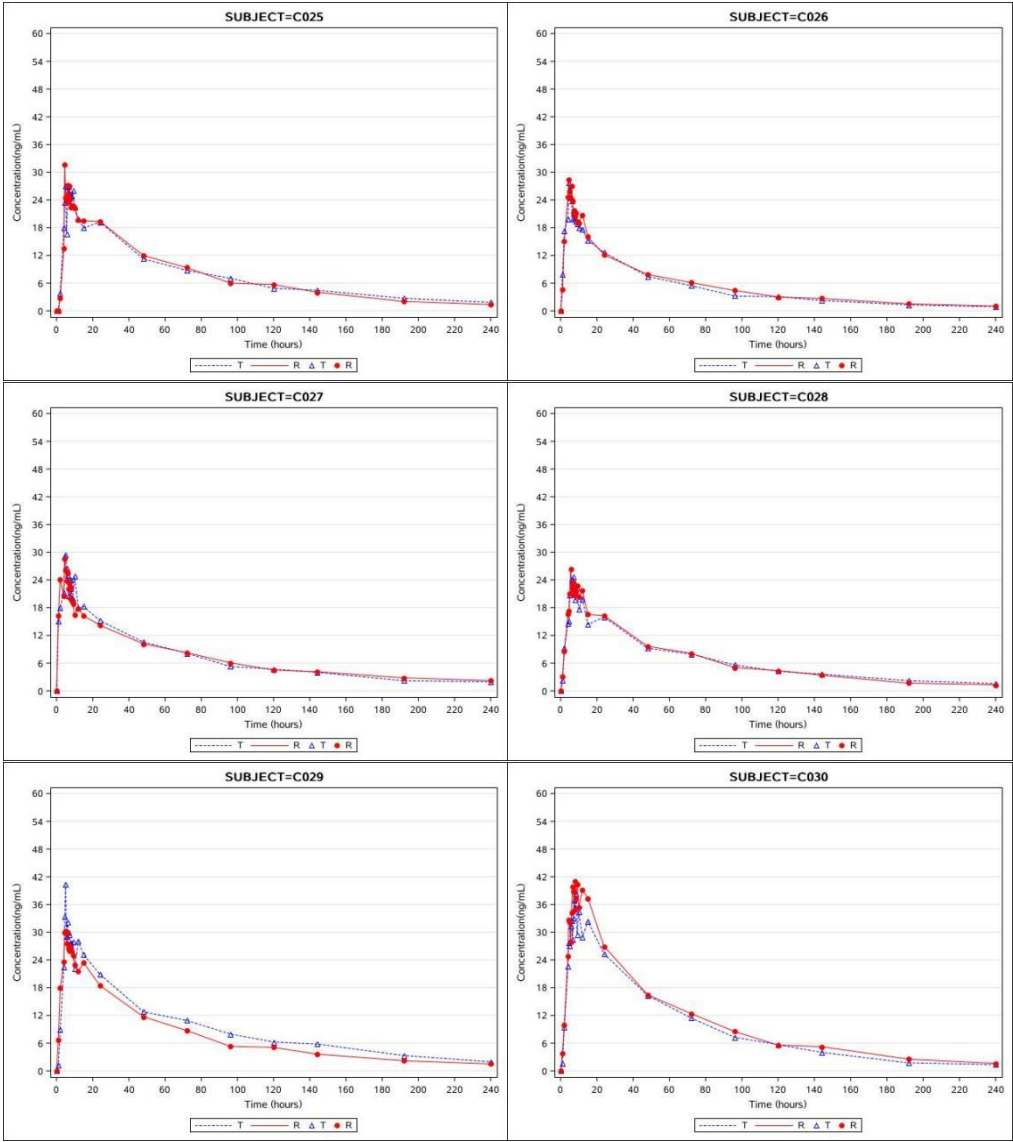

Supplement: CTS-16-2591-s001.pdf [file CTS-16-2591-s001.pdf]
